# Supplementary material for: An atomic-resolution view of neofunctionalization in the evolution of apicomplexan lactate dehydrogenases
Source: eLife journal article supplement (doi:10.7554/elife.02304), 2014-06-25
Supplement: supp [file elife_poa_e02304_Figure_2_source_data_1.pdf › elife_poa_e02304_Figure_2_source_data_1.pdf]

|           | $k_{cat}$<br>(sec <sup>-1</sup> ) | $K_M$<br>(μM) | $K_{i \text{ Pyruvate}}$<br>(mM) | $k_{cat}/K_M$<br>(sec <sup>-1</sup> M <sup>-1</sup> ) |
|-----------|-----------------------------------|---------------|----------------------------------|-------------------------------------------------------|
| Wild Type | 110 ± 2                           | 67 ± 5        | 59 ± 12                          | 1.6 ± 0.1<br>×10 <sup>6</sup>                         |
| T101A     | 39 ± 1                            | 30 ± 4        | 19 ± 3                           | 1.3 ± 0.2<br>×10 <sup>6</sup>                         |
| K102A     | 79 ± 2                            | 460 ± 57      | -                                | 1.7 ± 0.2<br>×10 <sup>5</sup>                         |
| A103S     | 130 ± 3                           | 180 ± 17      | 500 ± 890                        | 6.9 ± 0.6<br>×10 <sup>5</sup>                         |
| P105A     | 77 ± 2                            | 190 ± 25      | -                                | 4.1 ± 0.6<br>×10 <sup>5</sup>                         |
| G106A     | 150 ± 4                           | 360 ± 34      | 130 ± 75                         | 4.2 ± 0.3<br>×10 <sup>5</sup>                         |
| K107aA    | 140 ± 3                           | 440 ± 43      | -                                | 3.2 ± 0.3<br>×10 <sup>5</sup>                         |
| S107bA    | 110 ± 5                           | 100 ± 16      | -                                | 1.1 ± 0.2<br>×10 <sup>6</sup>                         |
| D107cA    | 98 ± 4                            | 120 ± 18      | 35 ± 10                          | 8.4 ± 1.2<br>×10 <sup>5</sup>                         |
| K107dA    | 74 ± 2                            | 52 ± 6        | 76 ± 29                          | 1.4 ± 0.2<br>×10 <sup>6</sup>                         |
| E107eA    | 190 ± 7                           | 180 ± 24      | 560 ± 180                        | 1.0 ± 0.1<br>×10 <sup>6</sup>                         |
| W107fA    | 0.071 ± 0.002                     | 3000 ± 320    | -                                | 2.3 ± 0.2<br>×10 <sup>1</sup>                         |
| N108A     | 150 ± 4                           | 550 ± 64      | -                                | 2.7 ± 0.3<br>×10 <sup>5</sup>                         |
