# Supplementary material for: An atomic-resolution view of neofunctionalization in the evolution of apicomplexan lactate dehydrogenases
Source: eLife journal article supplement (doi:10.7554/elife.02304), 2014-06-25
Supplement: supp [file elife_poa_e02304_Figure_4_source_data_1.pdf › elife_poa_e02304_Figure_4_source_data_1.pdf]

|                         | Oxaloacetate                      |                     |               |                                                       | Pyruvate                          |                     |               |                                                       |
|-------------------------|-----------------------------------|---------------------|---------------|-------------------------------------------------------|-----------------------------------|---------------------|---------------|-------------------------------------------------------|
|                         | $k_{cat}$<br>(sec <sup>-1</sup> ) | $K_M$<br>( $\mu$ M) | $K_i$<br>(mM) | $k_{cat}/K_M$<br>(sec <sup>-1</sup> M <sup>-1</sup> ) | $k_{cat}$<br>(sec <sup>-1</sup> ) | $K_M$<br>( $\mu$ M) | $K_i$<br>(mM) | $k_{cat}/K_M$<br>(sec <sup>-1</sup> M <sup>-1</sup> ) |
| <i>Pf</i> MDH           | 64 ± 4                            | 120 ± 30            | 14 ± 3.6      | 5.6 ± 1.2 ×10 <sup>5</sup>                            | -                                 | -                   | -             | -                                                     |
| <i>Cp</i> MDH           | 570 ± 30                          | 180 ± 20            | 6 ± 1.1       | 3.1 ± 0.2 ×10 <sup>6</sup>                            | -                                 | -                   | -             | -                                                     |
| <i>Pf</i> MDH-R102K     | 0.45 ± 0.04                       | 12000 ± 2000        | -             | 3.7 ± 0.3 ×10 <sup>1</sup>                            | -                                 | -                   | -             | -                                                     |
| <i>Pf</i> MDH-INS       | 11 ± 1                            | 3300 ± 1600         | -             | 3.2 ± 1.2 ×10 <sup>3</sup>                            | 0.17 ± 0.023                      | 48000 ± 11000       | -             | 3.5 ± 0.4 ×10 <sup>0</sup>                            |
| <i>Cp</i> MDH-INS       | 170 ± 10                          | 12100 ± 1850        | -             | 1.6 ± 0.2 ×10 <sup>4</sup>                            | 0.9 ± 0.2                         | 212000 ± 47000      | -             | 4.1 ± 0.2 ×10 <sup>0</sup>                            |
| <i>Pf</i> MDH-R102K-INS | 0.017 ± .001                      | 200 ± 61            | -             | 8.8 ± 2.8 ×10 <sup>1</sup>                            | 0.15 ± 0.01                       | 49000 ± 7400        | -             | 3.1 ± 0.2 ×10 <sup>0</sup>                            |
| <i>Pf</i> LDH-K102R-DEL | 6.3 ± 0.2                         | 2100 ± 250          | -             | 3.1 ± 0.3 ×10 <sup>3</sup>                            | 0.02 ± 0.0007                     | 3000 ± 280          | -             | 6.8 ± 0.5 ×10 <sup>0</sup>                            |
| <i>Pf</i> LDH-DEL       | 0.0064 ± 0.0002                   | 2100 ± 310          | -             | 3.1 ± 0.5 ×10 <sup>0</sup>                            | 0.021 ± 0.001                     | 1300 ± 250          | -             | 1.6 ± 0.3 ×10 <sup>1</sup>                            |
| <i>Tg</i> LDH2-DEL      | 5.4 ± 2.5                         | 135000 ± 77000      | -             | 5.5 ± 0.4 ×10 <sup>1</sup>                            | -                                 | -                   | -             | -                                                     |
| <i>Pf</i> LDH-K102R     | 0.7 ± 0.06                        | 12900 ± 2100        | -             | 5.3 ± 0.4 ×10 <sup>1</sup>                            | 150 ± 3                           | 210 ± 14            | 250 ± 96      | 7.1 ± 0.4 ×10 <sup>5</sup>                            |
| <i>Pf</i> LDH           | 0.17 ± 0.08                       | 139000 ± 93000      | -             | 0.09 ± 0.08 ×10 <sup>0</sup>                          | 110 ± 2                           | 67 ± 5              | 59 ± 12       | 1.6 ± 0.1 ×10 <sup>6</sup>                            |
| <i>Tg</i> LDH2          | 0.4 ± 0.03                        | 10700 ± 2600        | -             | 4.2 ± 0.9 ×10 <sup>1</sup>                            | 16 ± 0.4                          | 260 ± 35            | -             | 6.0 ± 0.7 ×10 <sup>4</sup>                            |
