# Supplementary material for: An atomic-resolution view of neofunctionalization in the evolution of apicomplexan lactate dehydrogenases
Source: eLife journal article supplement (doi:10.7554/elife.02304), 2014-06-25
Supplement: supp [file elife_poa_e02304_Figure_5_figure_supplement1.pdf › elife_poa_e02304_Figure_5_figure_supplement1.pdf]

# Figure 5-figure supplement 1

|         | AncMDH1 | AncMDH2 | AncMDH3 | AncLDH | CpMDH | PfMDH | TgLDH2 | TgLDH1 | PfLDH | RbMDH |
|---------|---------|---------|---------|--------|-------|-------|--------|--------|-------|-------|
| AncMDH1 | -       | 94%     | 86%     | 77%    | 60%   | 50%   | 60%    | 53%    | 52%   | 74%   |
| AncMDH2 | 94%     | -       | 89%     | 81%    | 62%   | 52%   | 60%    | 54%    | 55%   | 69%   |
| AncMDH3 | 86%     | 89%     | -       | 77%    | 65%   | 55%   | 60%    | 55%    | 54%   | 71%   |
| AncLDH  | 77%     | 81%     | 77%     | -      | 54%   | 49%   | 71%    | 66%    | 63%   | 59%   |
| CpMDH   | 60%     | 62%     | 65%     | 54%    | -     | 43%   | 48%    | 45%    | 42%   | 53%   |
| PfMDH   | 50%     | 52%     | 55%     | 49%    | 43%   | -     | 42%    | 41%    | 40%   | 49%   |
| TgLDH2  | 60%     | 60%     | 60%     | 71%    | 48%   | 42%   | -      | 73%    | 50%   | 50%   |
| TgLDH1  | 53%     | 54%     | 55%     | 66%    | 45%   | 41%   | 73%    | -      | 49%   | 46%   |
| PfLDH   | 52%     | 55%     | 54%     | 63%    | 42%   | 40%   | 50%    | 49%    | -     | 45%   |
| RbMDH   | 74%     | 69%     | 71%     | 59%    | 53%   | 49%   | 50%    | 46%    | 45%   | -     |
