# Supplementary material for: An atomic-resolution view of neofunctionalization in the evolution of apicomplexan lactate dehydrogenases
Source: eLife journal article supplement (doi:10.7554/elife.02304), 2014-06-25
Supplement: supp [file elife_poa_e02304_Figure_5_source_data_1.pdf › elife_poa_e02304_Figure_5_source_data_1.pdf]

|         | Oxaloacetate                      |                     |                 |                                                       | Pyruvate                          |                     |               |                                                       |
|---------|-----------------------------------|---------------------|-----------------|-------------------------------------------------------|-----------------------------------|---------------------|---------------|-------------------------------------------------------|
|         | $k_{cat}$<br>(sec <sup>-1</sup> ) | $K_M$<br>( $\mu$ M) | $K_i$<br>(mM)   | $k_{cat}/K_M$<br>(sec <sup>-1</sup> M <sup>-1</sup> ) | $k_{cat}$<br>(sec <sup>-1</sup> ) | $K_M$<br>( $\mu$ M) | $K_i$<br>(mM) | $k_{cat}/K_M$<br>(sec <sup>-1</sup> M <sup>-1</sup> ) |
| TgLDH1  | 1 $\pm$ 0.1                       | 26000 $\pm$ 2300    | -               | 3.7 $\pm$ 0.1<br>$\times 10^1$                        | 73 $\pm$ 2                        | 180 $\pm$ 10        | 47 $\pm$ 10   | 4.2 $\pm$ 0.2<br>$\times 10^5$                        |
| RbMDH   | 250 $\pm$ 10                      | 24 $\pm$ 2.5        | 0.84 $\pm$ 0.09 | 1.1 $\pm$ 0.07<br>$\times 10^7$                       | -                                 | -                   | -             | -                                                     |
| AncLDH  | 0.03 $\pm$ 0.001                  | 2300 $\pm$ 400      | -               | 1.3 $\pm$ 0.2<br>$\times 10^1$                        | 8.8 $\pm$ 0.4                     | 2.9 $\pm$ 0.5       | 5.9 $\pm$ 0.9 | 3.1 $\pm$ 0.6<br>$\times 10^6$                        |
| AncMDH3 | 10 $\pm$ 0.4                      | 1.4 $\pm$ 0.4       | 3.1 $\pm$ 0.6   | 6.9 $\pm$ 1.6<br>$\times 10^6$                        | 0.03 $\pm$ 0.001                  | 14800 $\pm$ 1000    | -             | 2.0 $\pm$ 0.1<br>$\times 10^0$                        |
| AncMDH2 | 7.5 $\pm$ 1                       | 0.4 $\pm$ 0.5       | 0.14 $\pm$ 0.06 | 3.3 $\pm$ 6.6<br>$\times 10^7$                        | 0.07 $\pm$ 0.006                  | 22000 $\pm$ 4400    | -             | 3.2 $\pm$ 0.4<br>$\times 10^0$                        |
| AncMDH1 | 40 $\pm$ 3                        | 3.1 $\pm$ 0.6       | 0.05 $\pm$ 0.01 | 1.2 $\pm$ 0.2<br>$\times 10^7$                        | 0.04 $\pm$ 0.001                  | 27800 $\pm$ 2400    | -             | 1.3 $\pm$ 0.06<br>$\times 10^0$                       |
