# Supplementary material for: An atomic-resolution view of neofunctionalization in the evolution of apicomplexan lactate dehydrogenases
Source: eLife journal article supplement (doi:10.7554/elife.02304), 2014-06-25
Supplement: supp [file elife_poa_e02304_Figure_6_source_data_1.pdf › elife_poa_e02304_Figure_6_source_data_1.pdf]

|                     | Oxaloacetate                      |               |               |                                                       | Pyruvate                          |               |               |                                                       |
|---------------------|-----------------------------------|---------------|---------------|-------------------------------------------------------|-----------------------------------|---------------|---------------|-------------------------------------------------------|
|                     | $k_{cat}$<br>(sec <sup>-1</sup> ) | $K_M$<br>(μM) | $K_i$<br>(mM) | $k_{cat}/K_M$<br>(sec <sup>-1</sup> M <sup>-1</sup> ) | $k_{cat}$<br>(sec <sup>-1</sup> ) | $K_M$<br>(μM) | $K_i$<br>(mM) | $k_{cat}/K_M$<br>(sec <sup>-1</sup> M <sup>-1</sup> ) |
| AncMDH2-59Mut       | 2.8 ± 0.2                         | 1 ± 0.5       | 0.58 ± 0.18   | 2.9 ± 1.4 ×10 <sup>6</sup>                            | 0.12 ± 0.02                       | 2000 ± 1000   | -             | 6.1 ± 2.4 ×10 <sup>1</sup>                            |
| AncMDH2-R102K       | 48 ± 5                            | 570 ± 120     | 3.7 ± 0.8     | 8.5 ± 1.1 ×10 <sup>4</sup>                            | 0.047 ± 0.013                     | 16000 ± 10000 | -             | 2.9 ± 1.1 ×10 <sup>0</sup>                            |
| AncMDH2-R102K-59Mut | 20 ± 1                            | 560 ± 78      | 15 ± 2.4      | 3.5 ± 0.4 ×10 <sup>4</sup>                            | 0.066 ± 0.003                     | 2300 ± 530    | -             | 2.8 ± 0.6 ×10 <sup>1</sup>                            |
| AncMDH2-INS         | 52 ± 4.8                          | 27 ± 5        | 0.23 ± 0.08   | 2.0 ± 0.4 ×10 <sup>6</sup>                            | 35 ± 2                            | 950 ± 120     | 4.2 ± 0.5     | 3.9 ± 0.2 ×10 <sup>4</sup>                            |
| AncMDH2-INS-59Mut   | 26 ± 1.3                          | 48 ± 5        | 0.048 ± 0.005 | 5.4 ± 0.6 ×10 <sup>5</sup>                            | 12 ± 1                            | 22 ± 4.2      | 6.7 ± 1.3     | 5.7 ± 1.1 ×10 <sup>5</sup>                            |
| AncMDH2-R102K-INS   | 0.25 ± 0.03                       | 350 ± 110     | 9.1 ± 3.4     | 7.3 ± 1.4 ×10 <sup>2</sup>                            | 27 ± 1                            | 130 ± 10      | 3.4 ± 0.2     | 2.1 ± 0.2 ×10 <sup>5</sup>                            |
