# Supplementary material for: An atomic-resolution view of neofunctionalization in the evolution of apicomplexan lactate dehydrogenases
Source: eLife journal article supplement (doi:10.7554/elife.02304), 2014-06-25
Supplement: supp [file elife_poa_e02304_Figure_6_source_data_2.pdf › elife_poa_e02304_Figure_6_source_data_2.pdf]

|                      | Oxaloacetate                      |               |               |                                                       | Pyruvate                          |               |               |                                                       |
|----------------------|-----------------------------------|---------------|---------------|-------------------------------------------------------|-----------------------------------|---------------|---------------|-------------------------------------------------------|
|                      | $k_{cat}$<br>(sec <sup>-1</sup> ) | $K_M$<br>(μM) | $K_i$<br>(mM) | $k_{cat}/K_M$<br>(sec <sup>-1</sup> M <sup>-1</sup> ) | $k_{cat}$<br>(sec <sup>-1</sup> ) | $K_M$<br>(μM) | $K_i$<br>(mM) | $k_{cat}/K_M$<br>(sec <sup>-1</sup> M <sup>-1</sup> ) |
| AncMDH2*             | 14 ± 0.8                          | 0.82 ± 0.32   | 0.35 ± 0.07   | 1.8 ± 0.6<br>×10 <sup>7</sup>                         | 0.03 ± 0.001                      | 16000 ± 2300  | -             | 1.9 ± 0.2<br>×10 <sup>0</sup>                         |
| AncMDH2*-INS         | 180 ± 20                          | 83 ± 12       | 0.15 ± 0.02   | 2.2 ± 0.1<br>×10 <sup>6</sup>                         | 74 ± 5                            | 4000 ± 380    | 5.2 ± 0.6     | 1.9 ± 0.1<br>×10 <sup>4</sup>                         |
| AncMDH2*-58Mut-R102K | 14 ± 0.3                          | 3000 ± 300    | -             | 4.8 ± 0.4<br>×10 <sup>3</sup>                         | 0.03 ± 0.002                      | 5300 ± 750    | 144 ± 59      | 6.5 ± 0.5<br>×10 <sup>0</sup>                         |
| AncLDH*              | 1.4 ± 0.1                         | 31000 ± 7800  | -             | 4.5 ± 0.7<br>×10 <sup>1</sup>                         | 63 ± 4                            | 94 ± 23       | 20 ± 6.5      | 6.7 ± 1.6<br>×10 <sup>5</sup>                         |
