# Supplementary material for: An atomic-resolution view of neofunctionalization in the evolution of apicomplexan lactate dehydrogenases
Source: eLife journal article supplement (doi:10.7554/elife.02304), 2014-06-25
Supplement: supp [file elife_poa_e02304_Figure_7_figure_supplement_1.pdf › elife_poa_e02304_Figure_7_figure_supplement_1.pdf]

|                                  | Oxamate/NADH                      | Lactate/NADH                       |
|----------------------------------|-----------------------------------|------------------------------------|
| <b>Resolution (Å)</b>            | 1.8                               | 2.0                                |
| <b>Resolution range (Å)</b>      | 43.44 - 1.80<br>(1.8643 - 1.80)   | 43.4 - 2.0<br>(2.0715 - 2.0)       |
| <b>Space group</b>               | P 1 21 1                          | P 1 21 1                           |
| <b>Unit cell</b>                 | 59.48 136.2 90.33<br>90 108.53 90 | 59.35 136.37 90.82<br>90 108.52 90 |
| <b>Unique reflections</b>        | 123994 (12379)                    | 90715 (9049)                       |
| <b>Completeness (%)</b>          | 99.9 (100)                        | 99.9 (99.7)                        |
| <b>Mean I/sigma(I)</b>           | 12.73 (2.24)                      | 8.51 (2.41)                        |
| <b>R-work</b>                    | 0.1691 (0.2765)                   | 0.1826 (0.3316)                    |
| <b>R-free</b>                    | 0.1986 (0.3119)                   | 0.2362 (0.3893)                    |
| <b>RMS(bonds)</b>                | 0.022                             | 0.014                              |
| <b>RMS(angles)</b>               | 1.86                              | 1.37                               |
| <b>Ramachandran favored (%)</b>  | 97                                | 97                                 |
| <b>Ramachandran outliers (%)</b> | 0                                 | 0.16                               |
| <b>Clashscore</b>                | 2.73                              | 8.02                               |
| <b>Average B-factor</b>          | 31.00                             | 45.40                              |
