# Supplementary material for: An atomic-resolution view of neofunctionalization in the evolution of apicomplexan lactate dehydrogenases
Source: eLife journal article supplement (doi:10.7554/elife.02304), 2014-06-25
Supplement: supp [file elife_poa_e02304_Figure_7_figure_supplement_2.pdf › elife_poa_e02304_Figure_7_figure_supplement_2.pdf]

|                                  | Oxamate/NADH                    | Lactate/NADH                    |
|----------------------------------|---------------------------------|---------------------------------|
| <b>Resolution (Å)</b>            | 1.3                             | 1.4                             |
| <b>Resolution range (Å)</b>      | 44.52 - 1.30<br>(1.3465 - 1.30) | 44.46 - 1.40<br>(1.450 - 1.40)  |
| <b>Space group</b>               | C 2 2 21                        | C 2 2 21                        |
| <b>Unit cell</b>                 | 113.68 143.26 91.54<br>90 90 90 | 113.44 143.19 91.42<br>90 90 90 |
| <b>Unique reflections</b>        | 179031 (17731)                  | 144049 (14316)                  |
| <b>Completeness (%)</b>          | 99.1 (98.6)                     | 100 (99.9)                      |
| <b>Mean I/sigma(I)</b>           | 17.44 (2.08)                    | 12.89 (2.46)                    |
| <b>R-work</b>                    | 0.1561 (0.2614)                 | 0.1277 (0.1980)                 |
| <b>R-free</b>                    | 0.1811 (0.2906)                 | 0.1461 (0.2199)                 |
| <b>RMS(bonds)</b>                | 0.015                           | 0.021                           |
| <b>RMS(angles)</b>               | 1.56                            | 1.91                            |
| <b>Ramachandran favored (%)</b>  | 98                              | 99                              |
| <b>Ramachandran outliers (%)</b> | 0                               | 0                               |
| <b>Clashscore</b>                | 1.58                            | 4.01                            |
| <b>Average B-factor</b>          | 18.20                           | 13.70                           |
