# Supplementary material for: An atomic-resolution view of neofunctionalization in the evolution of apicomplexan lactate dehydrogenases
Source: eLife journal article supplement (doi:10.7554/elife.02304), 2014-06-25
Supplement: supp [file elife_poa_e02304_Figure_7_figure_supplement_3.pdf › elife_poa_e02304_Figure_7_figure_supplement_3.pdf]

|                                      | <b>Oxamate/NADH</b>             | <b>Lactate/NADH</b>             |
|--------------------------------------|---------------------------------|---------------------------------|
| <b>Resolution (Å)</b>                | 1.9                             | 2.0                             |
| <b>Resolution range (Å)</b>          | 45.14 - 1.90<br>(1.9679 - 1.90) | 48.8 - 2.0<br>(2.0801 - 2.0)    |
| <b>Space group</b>                   | P 21 21 21                      | P 21 21 21                      |
| <b>Unit cell</b>                     | 89.42 104.57 142.46<br>90 90 90 | 90.39 103.77 143.76<br>90 90 90 |
| <b>Unique reflections</b>            | 103926 (10178)                  | 90486 (9926)                    |
| <b>Completeness (%)</b>              | 99.9 (99.2)                     | 99.9 (100)                      |
| <b>Mean I/sigma(I)</b>               | 14.43 (2.71)                    | 19.45 (2.50)                    |
| <b>R-work</b>                        | 0.1871 (0.3257)                 | 0.1796 (0.2411)                 |
| <b>R-free</b>                        | 0.2244 (0.3686)                 | 0.2019 (0.2572)                 |
| <b>RMS(bonds)</b>                    | 0.014                           | 0.014                           |
| <b>RMS(angles)</b>                   | 1.34                            | 1.28                            |
| <b>Ramachandran<br/>favored (%)</b>  | 97                              | 98                              |
| <b>Ramachandran<br/>outliers (%)</b> | 0.32                            | 0.16                            |
| <b>Clashscore</b>                    | 5.54                            | 2.09                            |
| <b>Average B-factor</b>              | 14.30                           | 28.70                           |
