# Supplementary material for: An atomic-resolution view of neofunctionalization in the evolution of apicomplexan lactate dehydrogenases
Source: eLife journal article supplement (doi:10.7554/elife.02304), 2014-06-25
Supplement: supp [file elife_poa_e02304_Figure_8_source_data_1.pdf › elife_poa_e02304_Figure_8_source_data_1.pdf]

|               | Oxaloacetate                      |                     |                 |                                                       | Pyruvate                          |                     |               |                                                       |
|---------------|-----------------------------------|---------------------|-----------------|-------------------------------------------------------|-----------------------------------|---------------------|---------------|-------------------------------------------------------|
|               | $k_{cat}$<br>(sec <sup>-1</sup> ) | $K_M$<br>( $\mu$ M) | $K_i$<br>(mM)   | $k_{cat}/K_M$<br>(sec <sup>-1</sup> M <sup>-1</sup> ) | $k_{cat}$<br>(sec <sup>-1</sup> ) | $K_M$<br>( $\mu$ M) | $K_i$<br>(mM) | $k_{cat}/K_M$<br>(sec <sup>-1</sup> M <sup>-1</sup> ) |
| AncMDH2-R102L | 10 $\pm$ 1                        | 2000 $\pm$ 320      | 12 $\pm$ 2.3    | 4.9 $\pm$ 0.5 $\times 10^3$                           | 2.4 $\pm$ 0.1                     | 22000 $\pm$ 1300    | -             | 1.1 $\pm$ 0.1 $\times 10^2$                           |
| AncMDH2-R102G | 44 $\pm$ 10                       | 4300 $\pm$ 1300     | 5 $\pm$ 1.5     | 1.0 $\pm$ 0.1 $\times 10^4$                           | 6.9 $\pm$ 0.1                     | 16000 $\pm$ 900     | -             | 4.4 $\pm$ 0.2 $\times 10^2$                           |
| AncMDH2-R102Q | 12 $\pm$ 0.2                      | 880 $\pm$ 40        | 0.88 $\pm$ 0.04 | 1.3 $\pm$ 0.1 $\times 10^4$                           | 40 $\pm$ 4.2                      | 4500 $\pm$ 700      | 2.9 $\pm$ 0.4 | 9.2 $\pm$ 0.4 $\times 10^3$                           |
| AncMDH2-R102W | 0.18 $\pm$ 0.008                  | 23000 $\pm$ 2400    | -               | 8.1 $\pm$ 0.6 $\times 10^0$                           | 0.15 $\pm$ 0.003                  | 23000 $\pm$ 1000    | -             | 6.5 $\pm$ 0.2 $\times 10^0$                           |
