# Supplementary material for: An atomic-resolution view of neofunctionalization in the evolution of apicomplexan lactate dehydrogenases
Source: eLife journal article supplement (doi:10.7554/elife.02304), 2014-06-25
Supplement: supp [file elife_poa_e02304_Supplementary_file_2.pdf › elife_poa_e02304_Supplementary_file_2.pdf]

| Construct            | MW (Da) | $\epsilon_{280}$ (M <sup>-1</sup> cm <sup>-1</sup> ) | Construct               | MW (Da) | $\epsilon_{280}$ (M <sup>-1</sup> cm <sup>-1</sup> ) | Construct            | MW (Da) | $\epsilon_{280}$ (M <sup>-1</sup> cm <sup>-1</sup> ) |
|----------------------|---------|------------------------------------------------------|-------------------------|---------|------------------------------------------------------|----------------------|---------|------------------------------------------------------|
| <i>Pf</i> LDH        | 34930.6 | 17420                                                | <i>Pf</i> MDH-R102K     | 35077.7 | 11920                                                | AncMDH2-R102K-INS    | 36382.9 | 25900                                                |
| <i>Pf</i> LDH_T101A  | 34900.5 | 17420                                                | <i>Pf</i> MDH-INS       | 35751.3 | 17420                                                | AncLDH               | 36969.6 | 27390                                                |
| <i>Pf</i> LDH_K102A  | 34873.5 | 17420                                                | <i>Cp</i> MDH-INS       | 35335.7 | 20400                                                | AncMDH2-R102L        | 35725.3 | 20400                                                |
| <i>Pf</i> LDH_A103S  | 34946.6 | 17420                                                | <i>Pf</i> MDH-R102K-INS | 35723.3 | 17420                                                | AncMDH2-R102G        | 35669.2 | 20400                                                |
| <i>Pf</i> LDH_P105A  | 34904.5 | 17420                                                | <i>Pf</i> LDH-K102R-DEL | 34312.9 | 11920                                                | AncMDH2-R102Q        | 35740.3 | 20400                                                |
| <i>Pf</i> LDH_G106A  | 34944.6 | 17420                                                | <i>Pf</i> LDH-DEL       | 34284.9 | 11920                                                | AncMDH2-R102W        | 35798.3 | 25900                                                |
| <i>Pf</i> LDH_K107aA | 34873.5 | 17420                                                | <i>Tg</i> LDH2-DEL      | 35729.5 | 11920                                                | AncMDH2*             | 35360.1 | 11920                                                |
| <i>Pf</i> LDH_S107bA | 34914.6 | 17420                                                | <i>Pf</i> LDH-K102R     | 34958.6 | 17420                                                | AncMDH2*-INS         | 36002.8 | 17420                                                |
| <i>Pf</i> LDH_D107cA | 34886.5 | 17420                                                | <i>Tg</i> LDH2          | 36372.2 | 17420                                                | AncMDH2*-58Mut-R102K | 35964.8 | 11920                                                |
| <i>Pf</i> LDH_K107dA | 34873.5 | 17420                                                | AncMDH2                 | 35768.3 | 20400                                                | AncLDH*              | 36607.4 | 17420                                                |
| <i>Pf</i> LDH_E107eA | 34872.5 | 17420                                                | AncMDH2-59Mut           | 36355.0 | 21890                                                | AncMDH3              | 35285.0 | 11920                                                |
| <i>Pf</i> LDH_W107fA | 34815.4 | 11920                                                | AncMDH2-R102K           | 35740.3 | 20400                                                | AncMDH1              | 35188.6 | 21890                                                |
| <i>Pf</i> LDH_N108A  | 34887.5 | 17420                                                | AncMDH2-R102K-59Mut     | 36327.0 | 21890                                                | <i>Tg</i> LDH1       | 36613.5 | 23380                                                |
| <i>Pf</i> MDH        | 35105.7 | 11920                                                | AncMDH2-INS             | 36411.0 | 25900                                                | <i>Rb</i> MDH        | 34716.3 | 14900                                                |
| <i>Cp</i> MDH        | 34693.1 | 14900                                                | AncMDH2-INS-59Mut       | 36997.6 | 27390                                                |                      |         |                                                      |
