# Supplementary figures and images for: An atomic-resolution view of neofunctionalization in the evolution of apicomplexan lactate dehydrogenases
Source: eLife journal article supplement (doi:10.7554/elife.02304), 2014-06-25

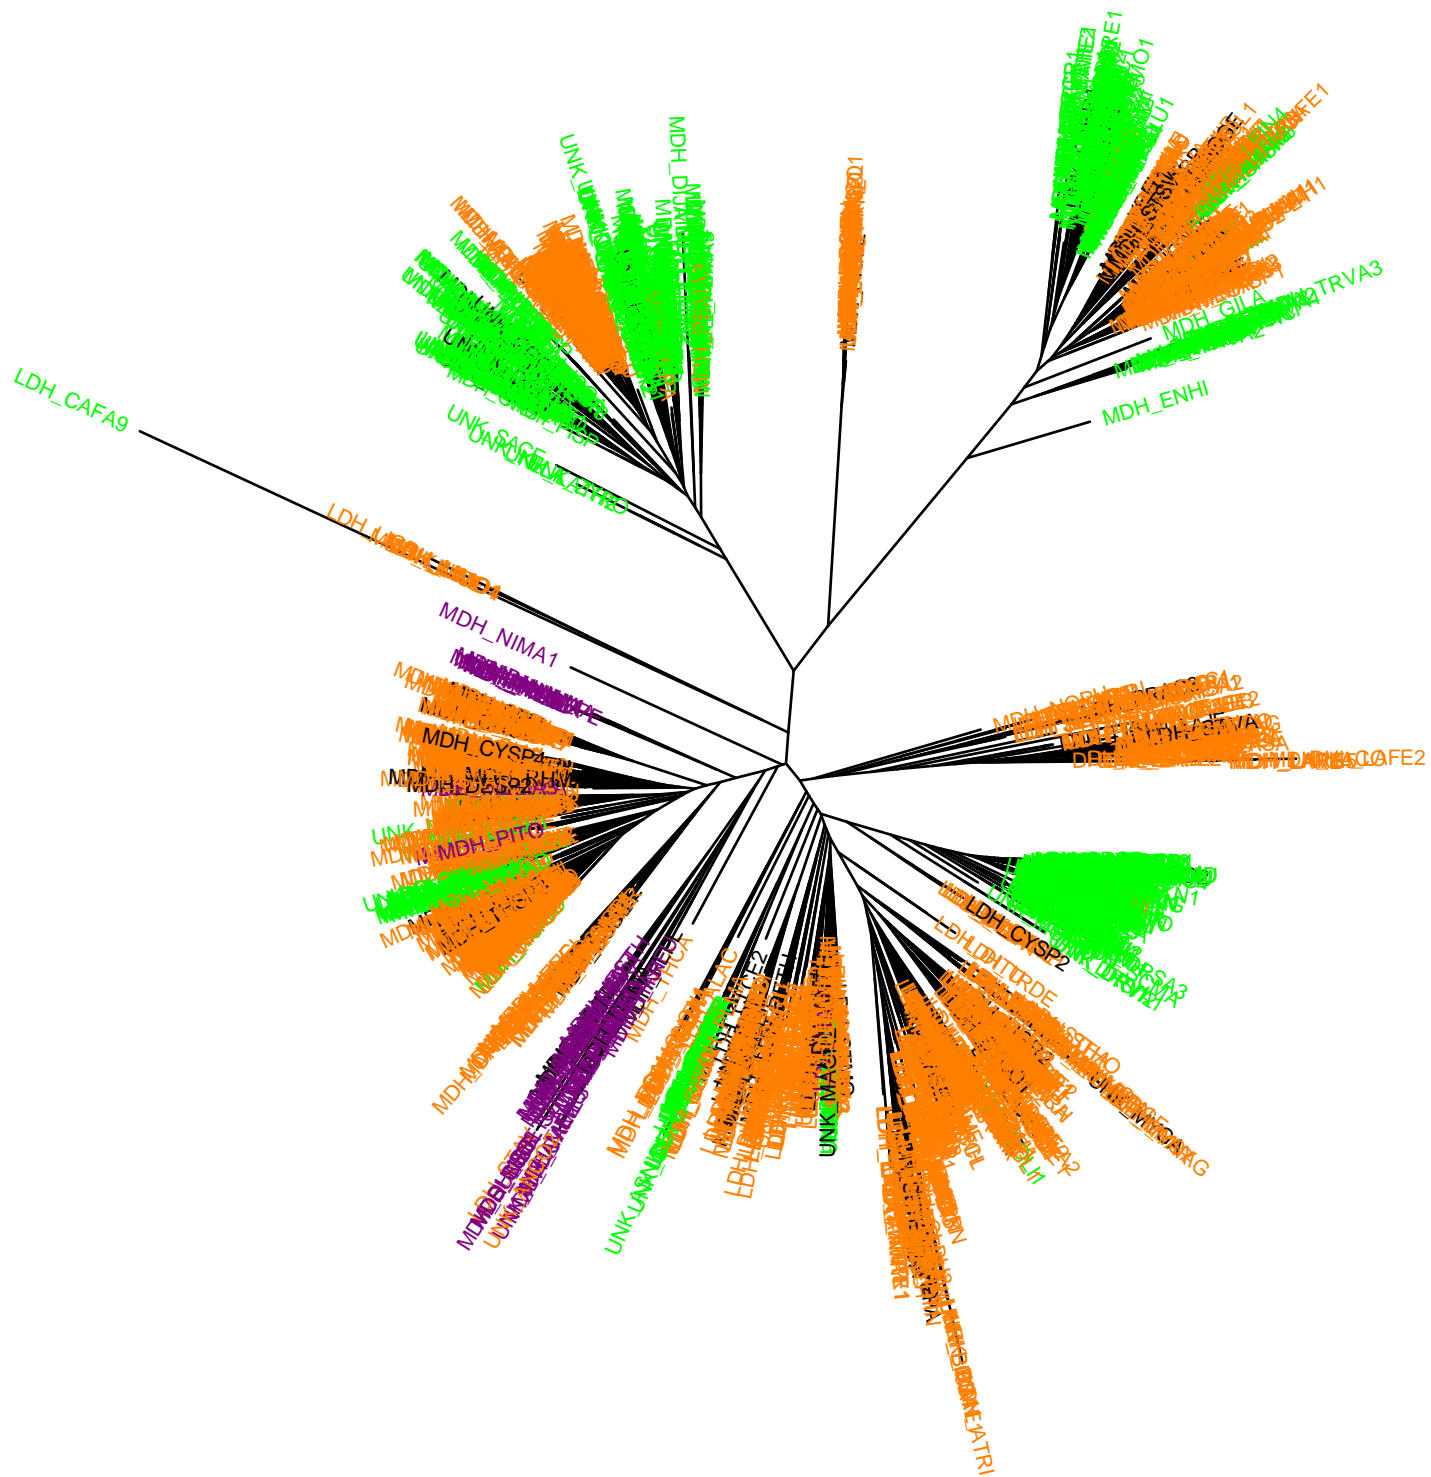

Supplement: supp [file Original_LDHMDH_Phylogeny_DomainColored.pdf › Bioinformatics_Files/Original_LDHMDH_Phylogeny_DomainColored.pdf]

**Figure 1-figure supplement 1**

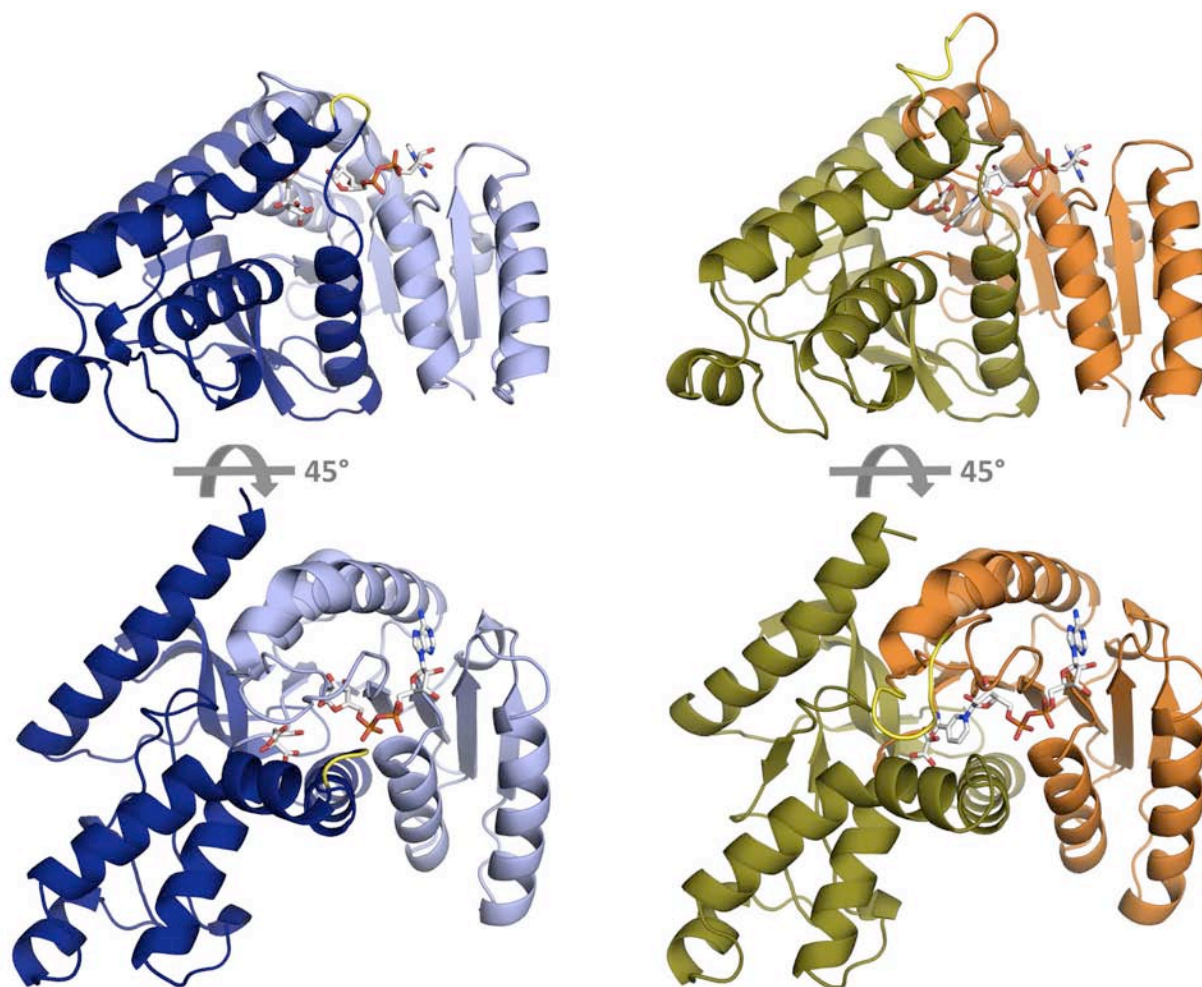

Supplement: supp [file elife_poa_e02304_Figure_1_figure_supplement_1.pdf › elife_poa_e02304_Figure_1_figure_supplement_1.pdf]

Figure 2-figure supplement 1

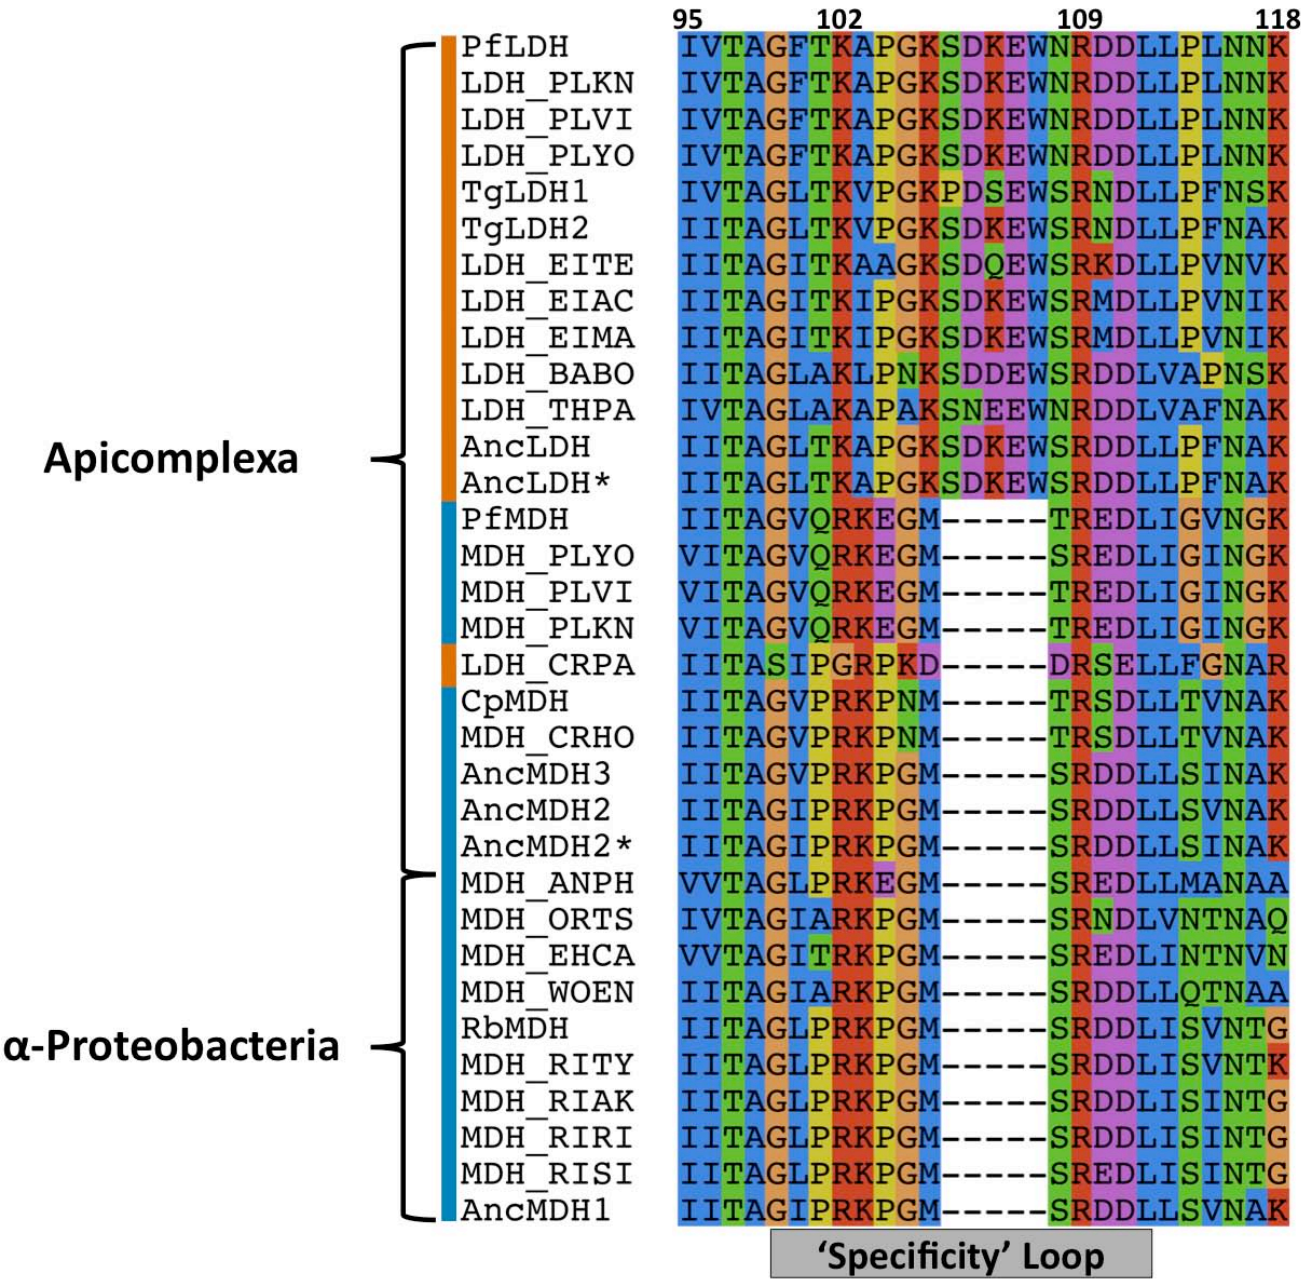

Supplement: supp [file elife_poa_e02304_Figure_2_figure_supplement_1.pdf › elife_poa_e02304_Figure_2_figure_supplement_1.pdf]

## Figure 2-figure supplement 2

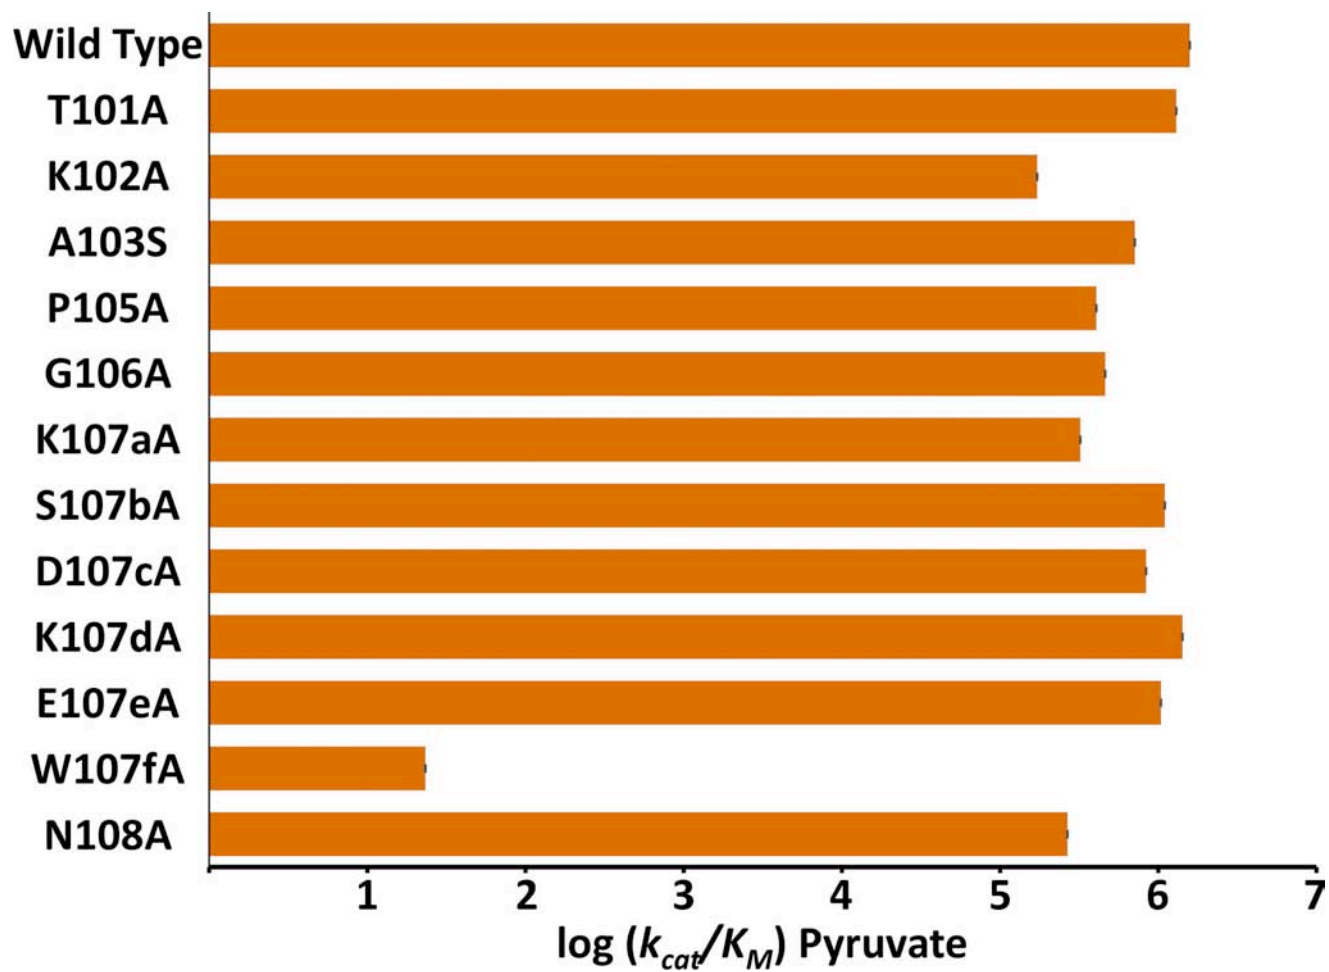

Supplement: supp [file elife_poa_e02304_Figure_2_figure_supplement_2.pdf › elife_poa_e02304_Figure_2_figure_supplement_2.pdf]

## Figure 2-figure supplement 3

**A**

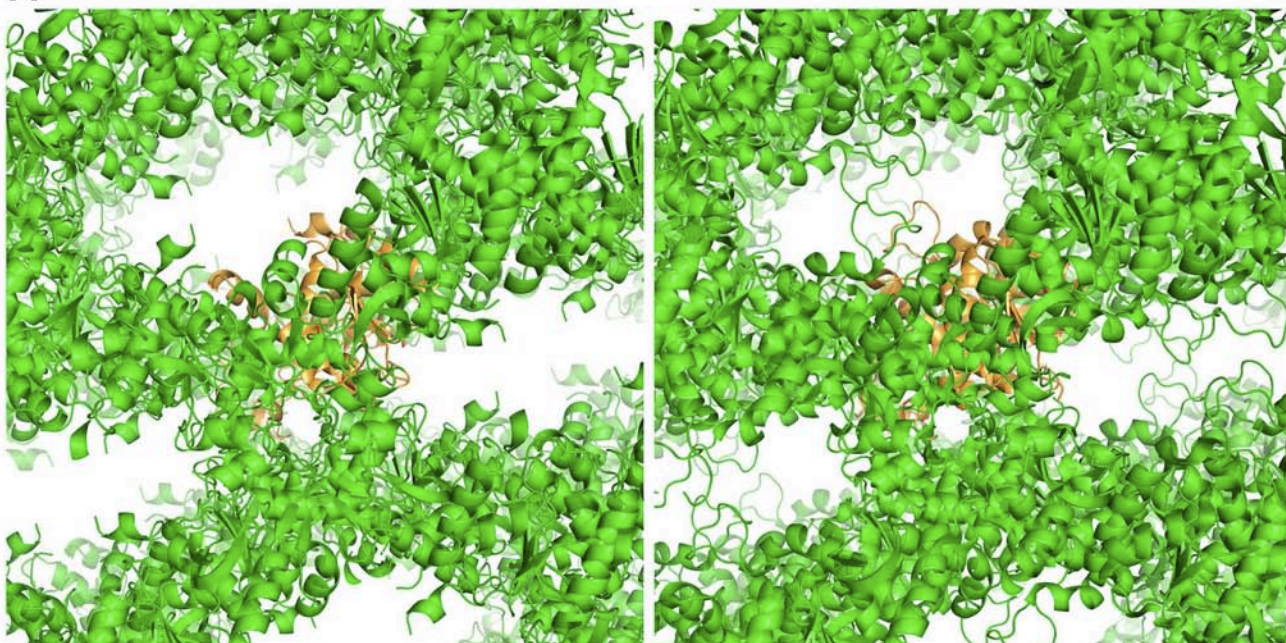

**W107fA**

**1T2D**

**B**

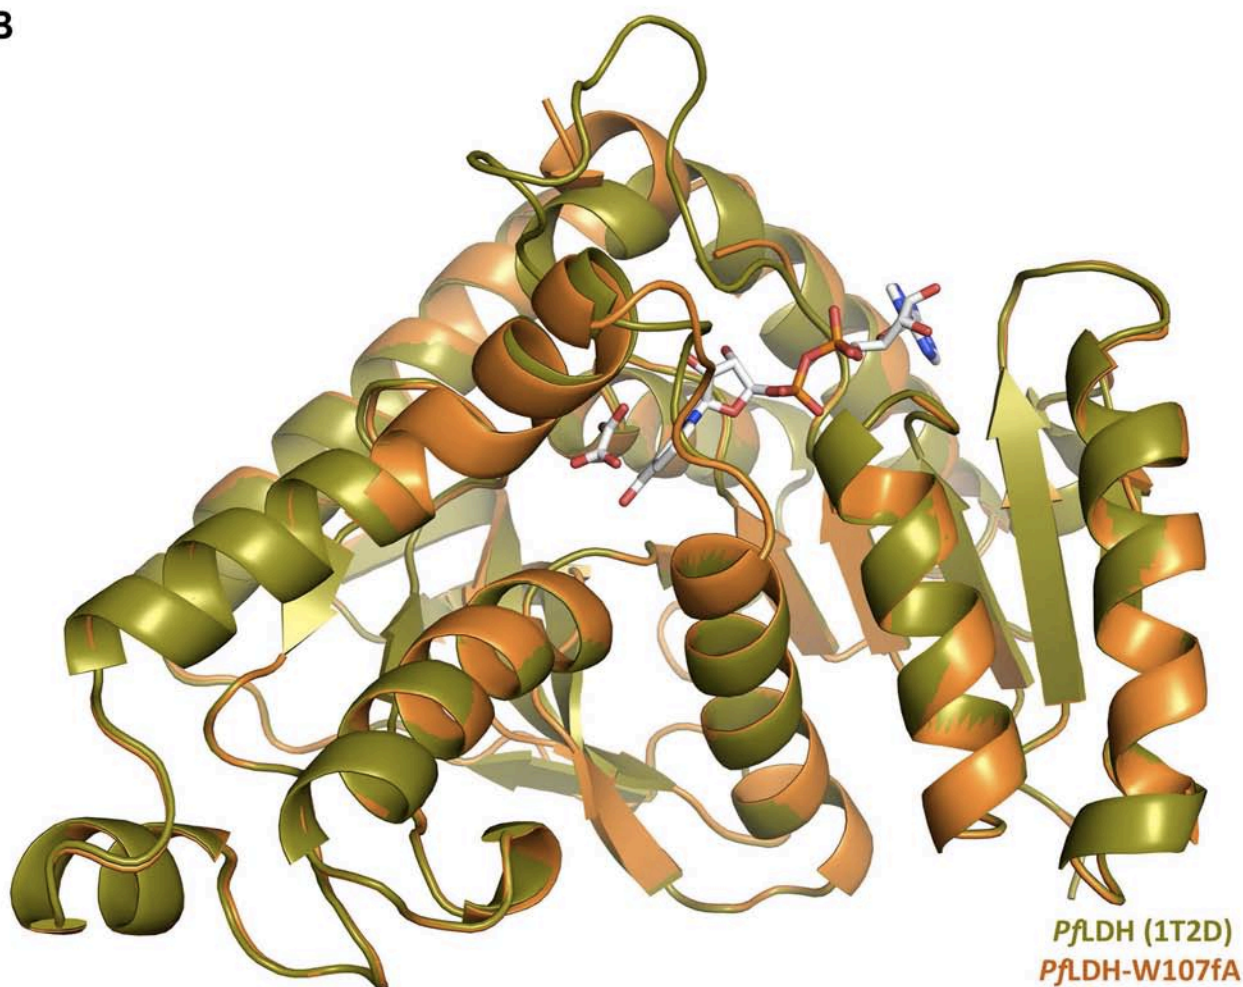

*PflDH* (1T2D)  
*PflDH*-W107fA

Supplement: supp [file elife_poa_e02304_Figure_2_figure_supplement_3.pdf › elife_poa_e02304_Figure_2_figure_supplement_3.pdf]

**Figure 3-figure supplement 1**

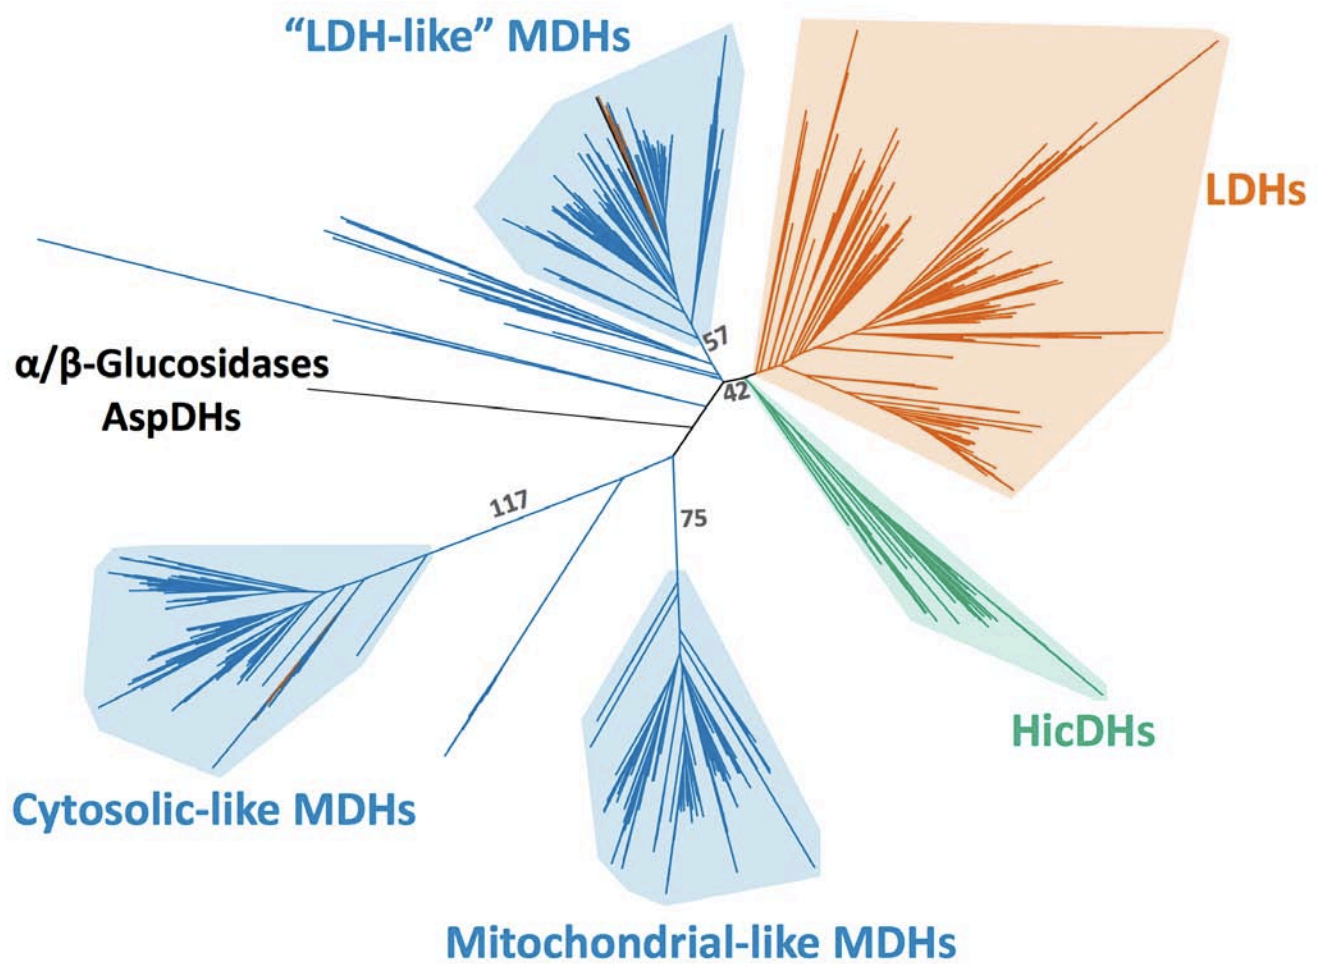

Supplement: supp [file elife_poa_e02304_Figure_3_figure_supplement_1.pdf › elife_poa_e02304_Figure_3_figure_supplement_1.pdf]

**Figure 3-figure supplement 2**

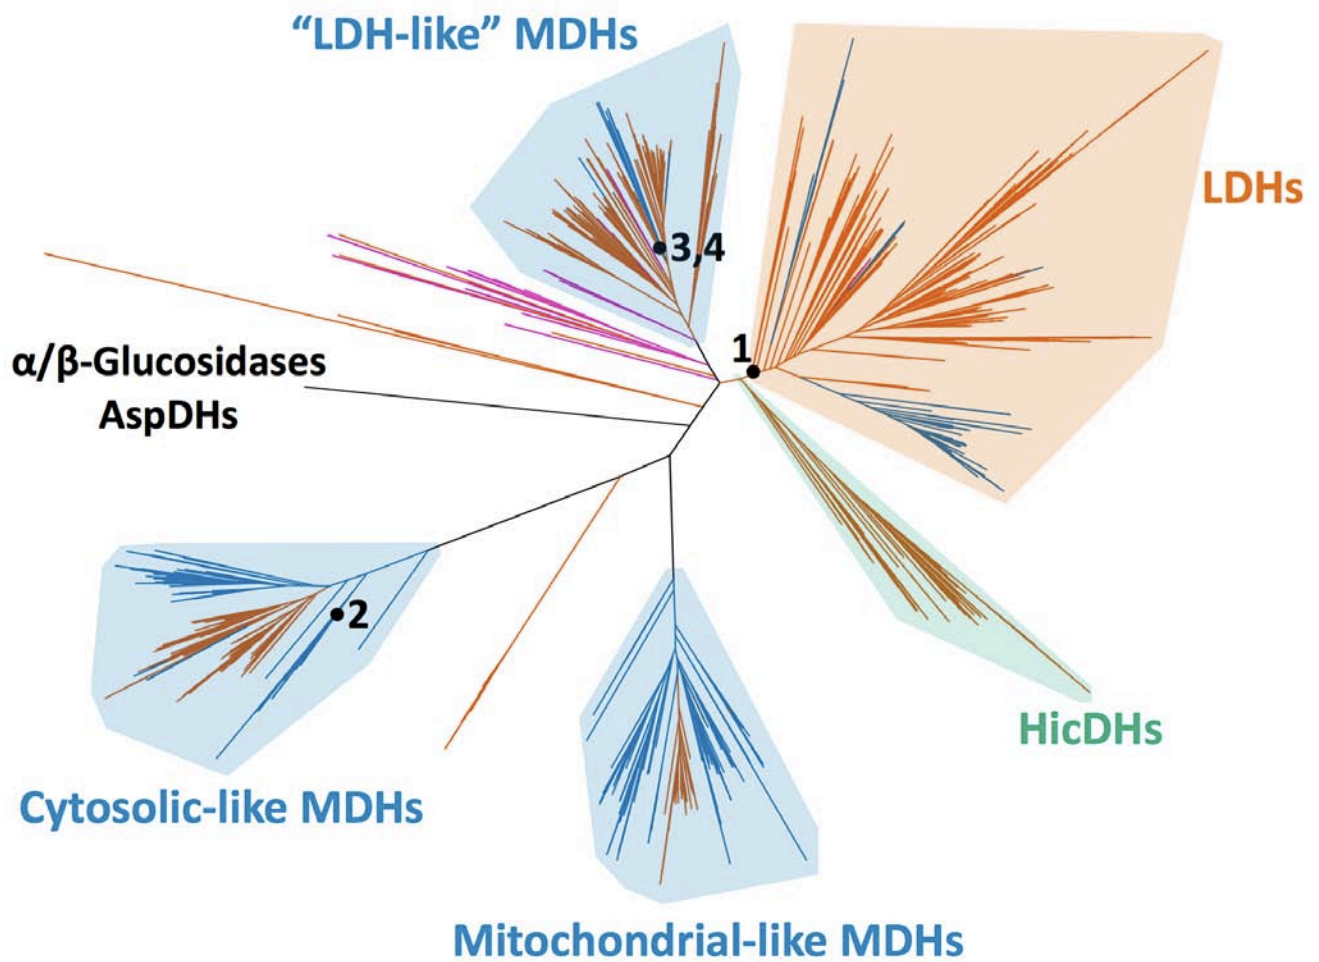

Supplement: supp [file elife_poa_e02304_Figure_3_figure_supplement_2.pdf › elife_poa_e02304_Figure_3_figure_supplement_2.pdf]

# Figure 3-figure supplement 3

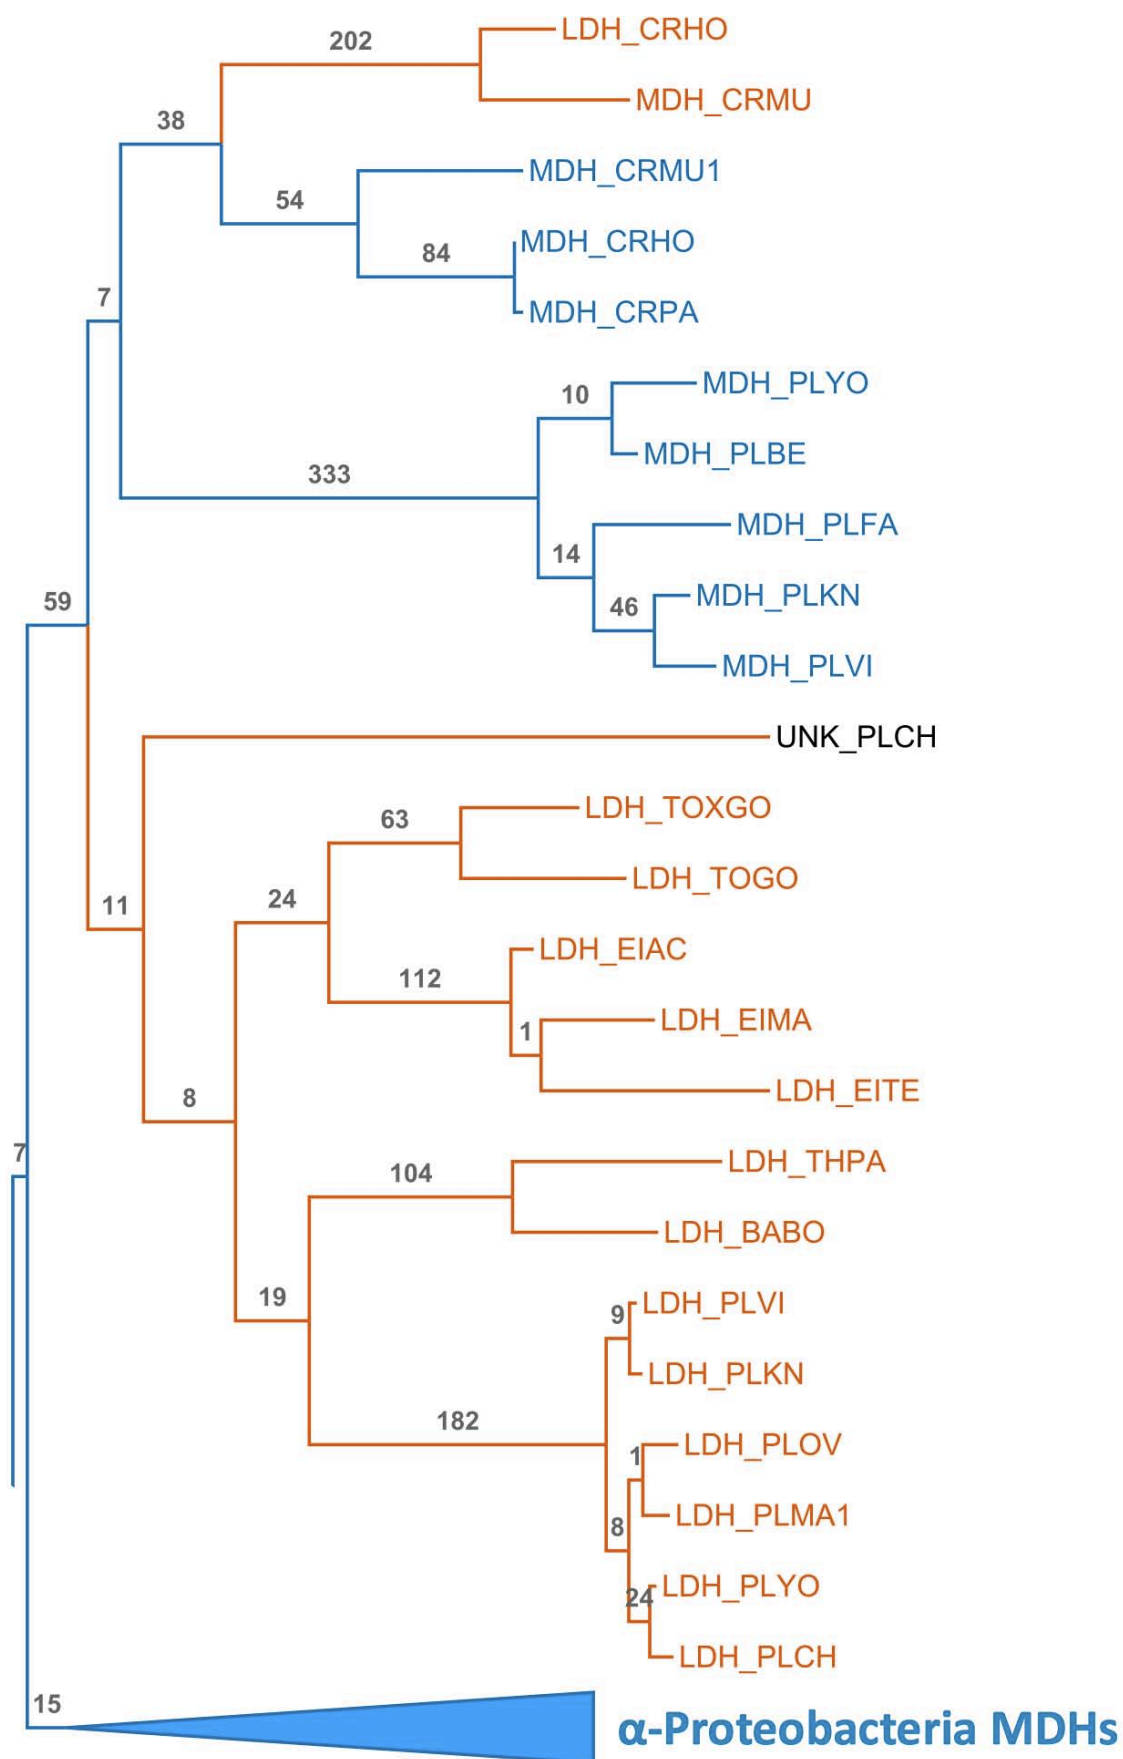

Supplement: supp [file elife_poa_e02304_Figure_3_figure_supplement_3.pdf › elife_poa_e02304_Figure_3_figure_supplement_3.pdf]

# Figure 6-figure supplement 1

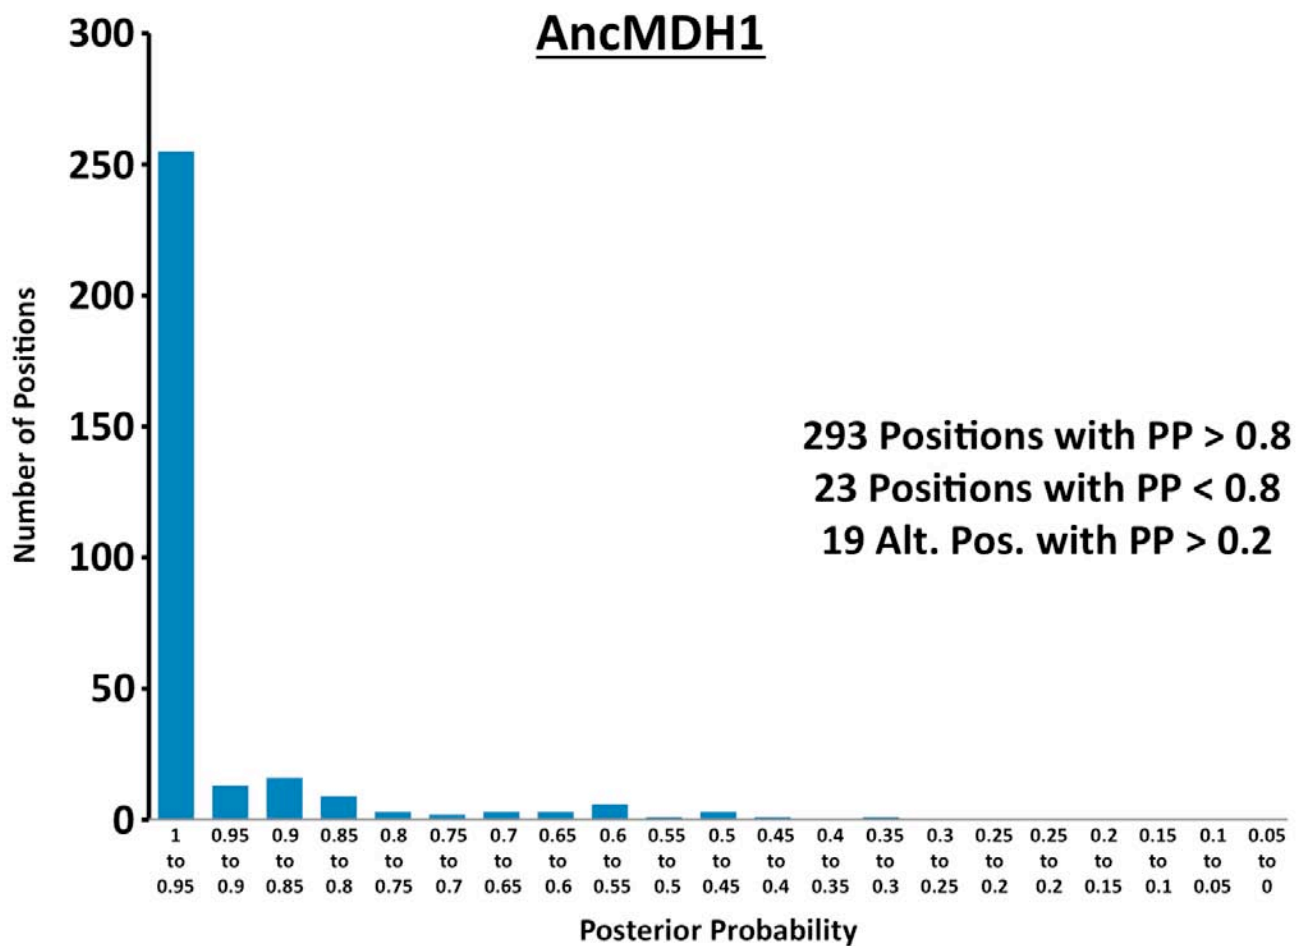

Supplement: supp [file elife_poa_e02304_Figure_6_figure_supplement1.pdf › elife_poa_e02304_Figure_6_figure_supplement1.pdf]

## Figure 6-figure supplement 2

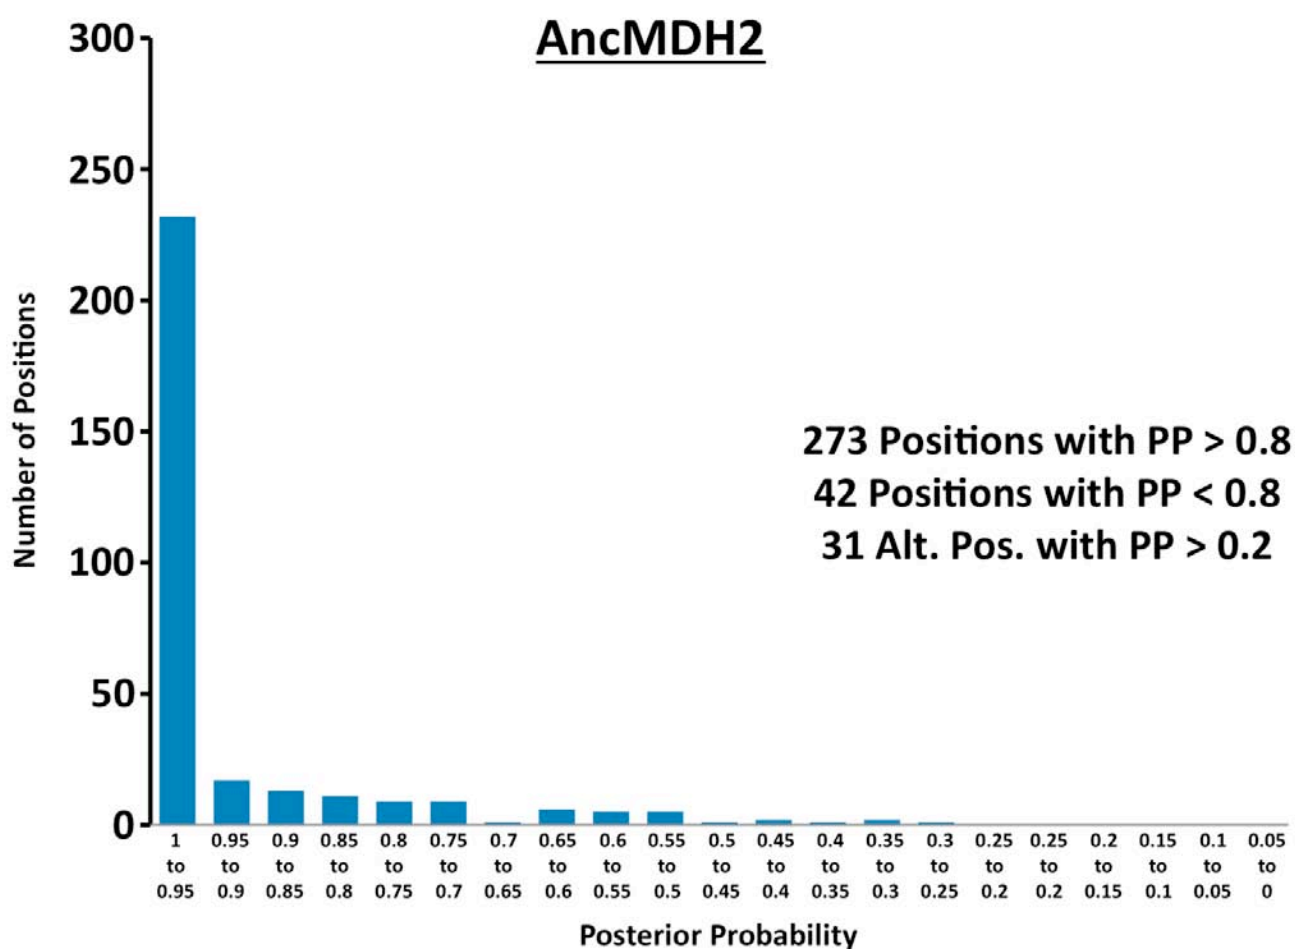

Supplement: supp [file elife_poa_e02304_Figure_6_figure_supplement_2.pdf › elife_poa_e02304_Figure_6_figure_supplement_2.pdf]

## Figure 6-figure supplement 3

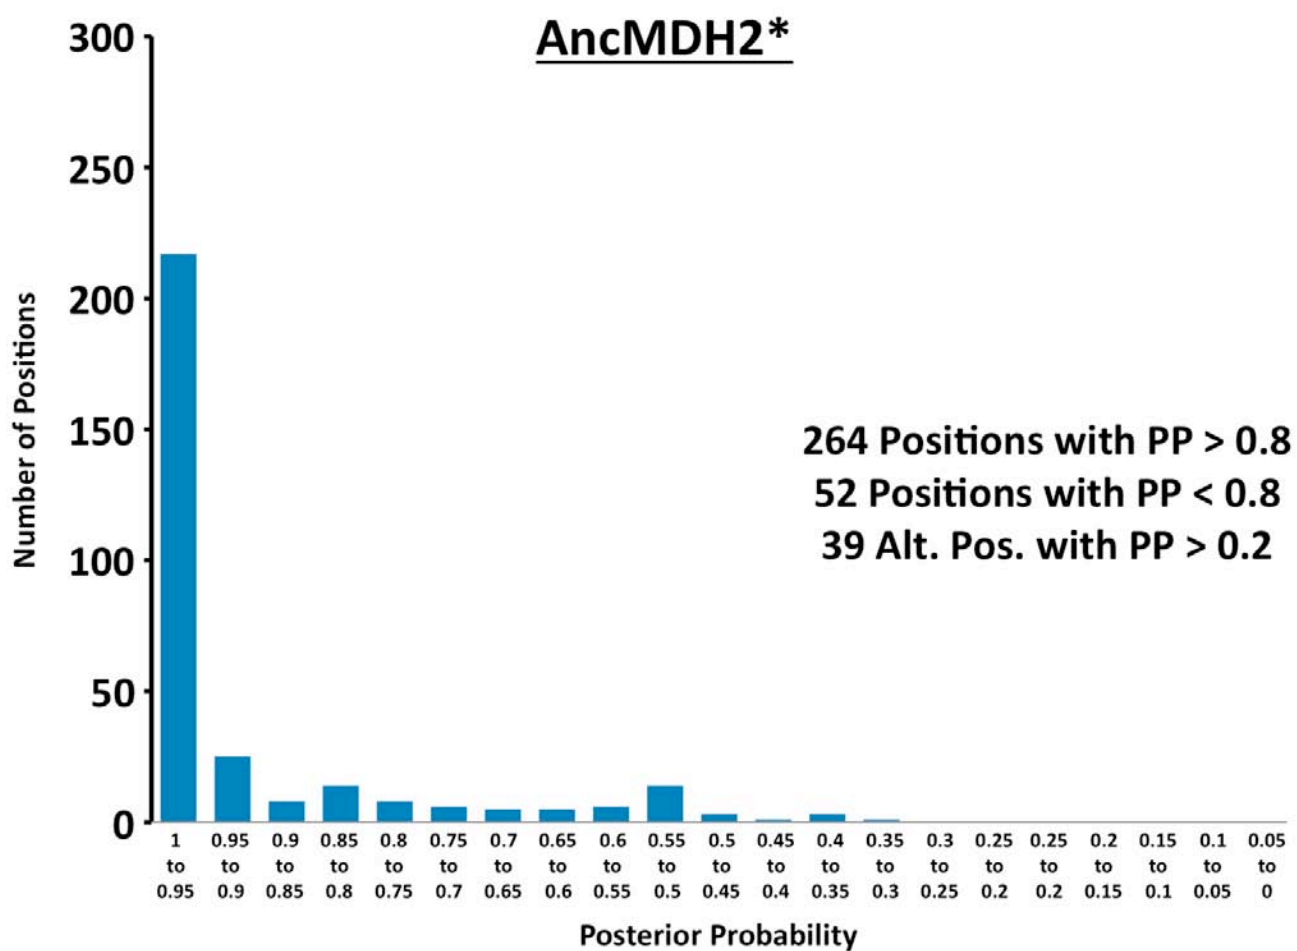

Supplement: supp [file elife_poa_e02304_Figure_6_figure_supplement_3.pdf › elife_poa_e02304_Figure_6_figure_supplement_3.pdf]

## Figure 6-figure supplement 4

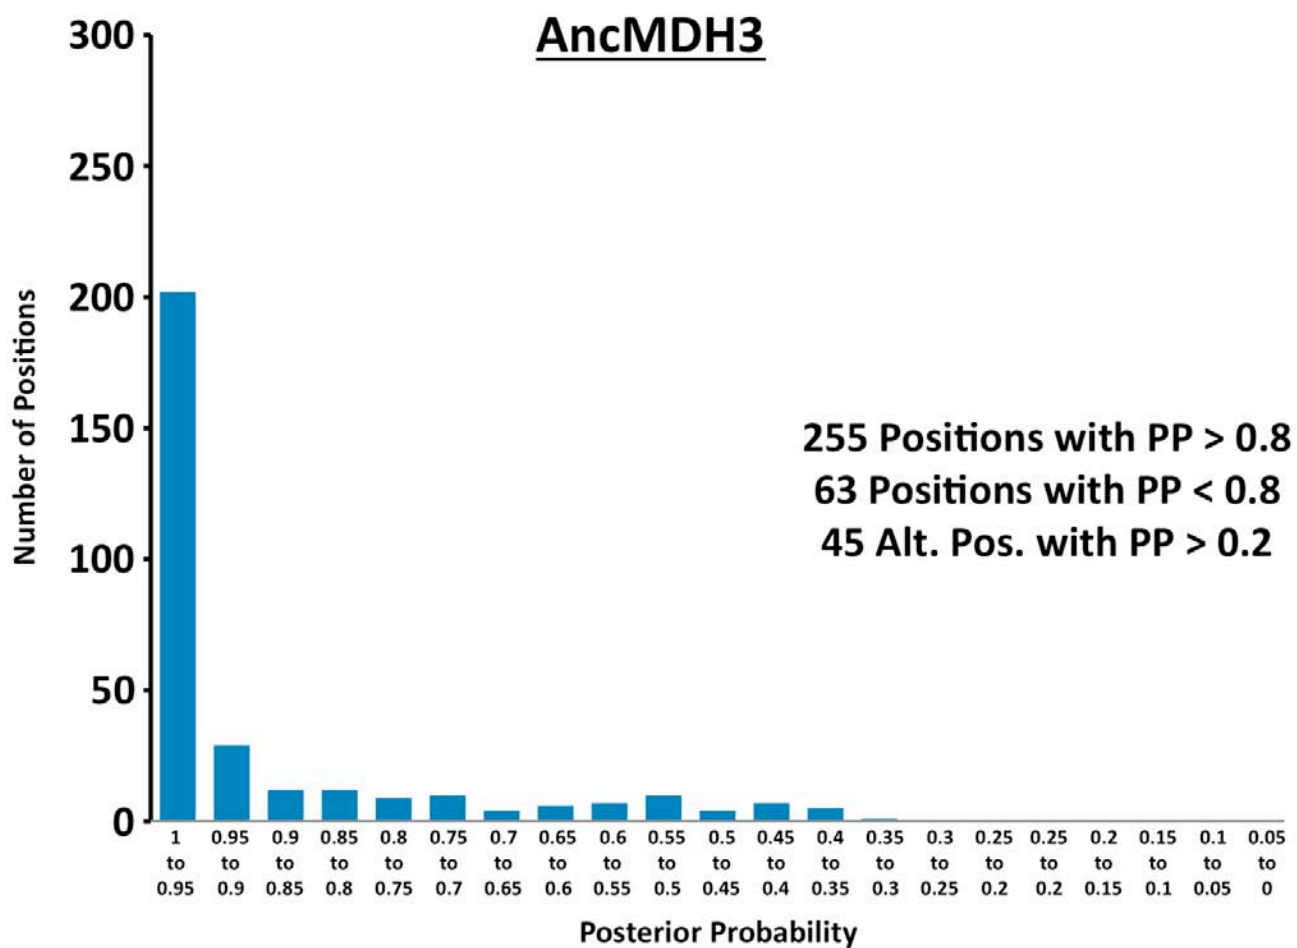

Supplement: supp [file elife_poa_e02304_Figure_6_figure_supplement_4.pdf › elife_poa_e02304_Figure_6_figure_supplement_4.pdf]

## Figure 6-figure supplement 5

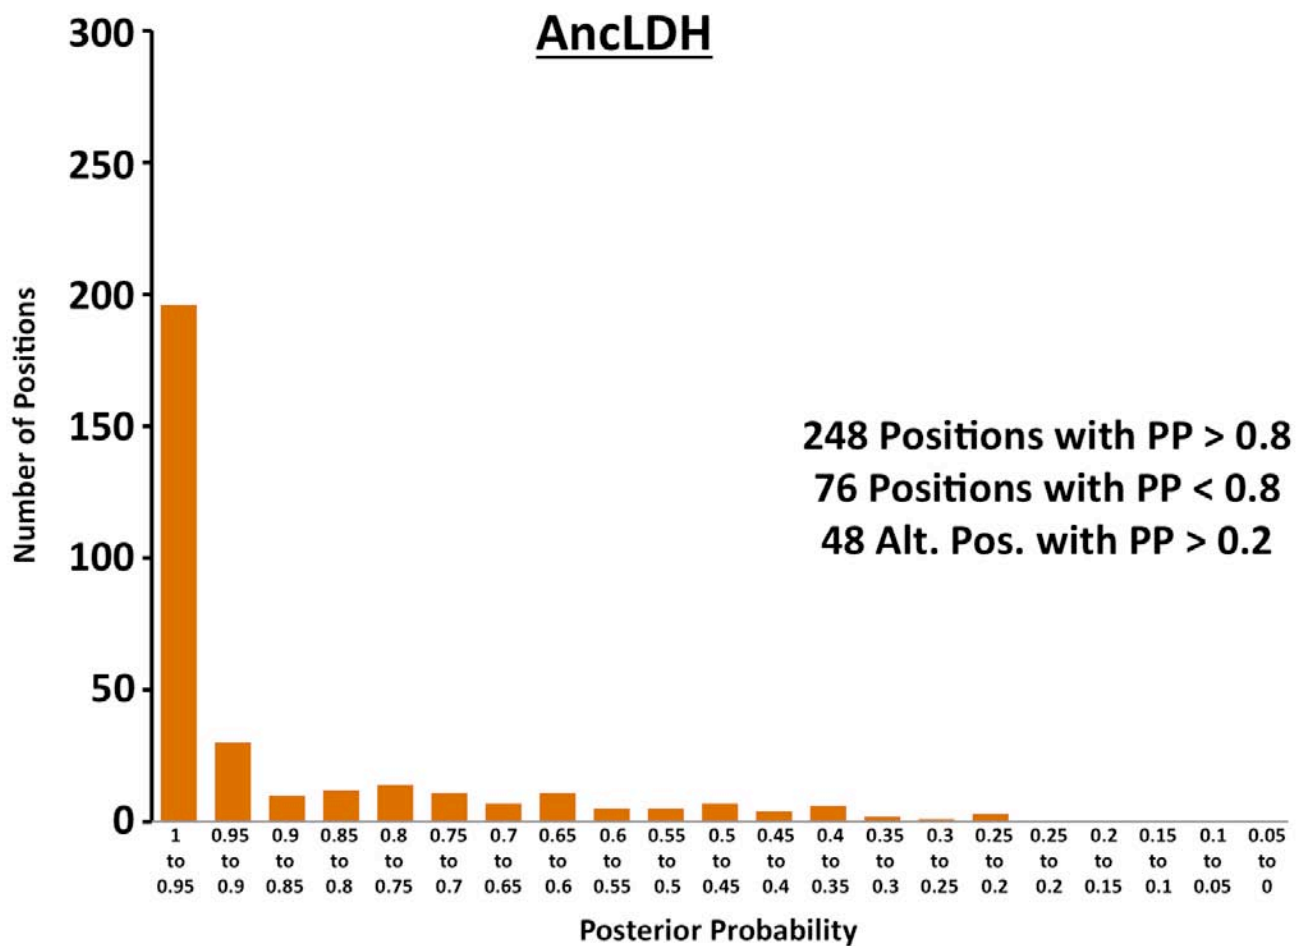

Supplement: supp [file elife_poa_e02304_Figure_6_figure_supplement_5.pdf › elife_poa_e02304_Figure_6_figure_supplement_5.pdf]

## Figure 6-figure supplement 6

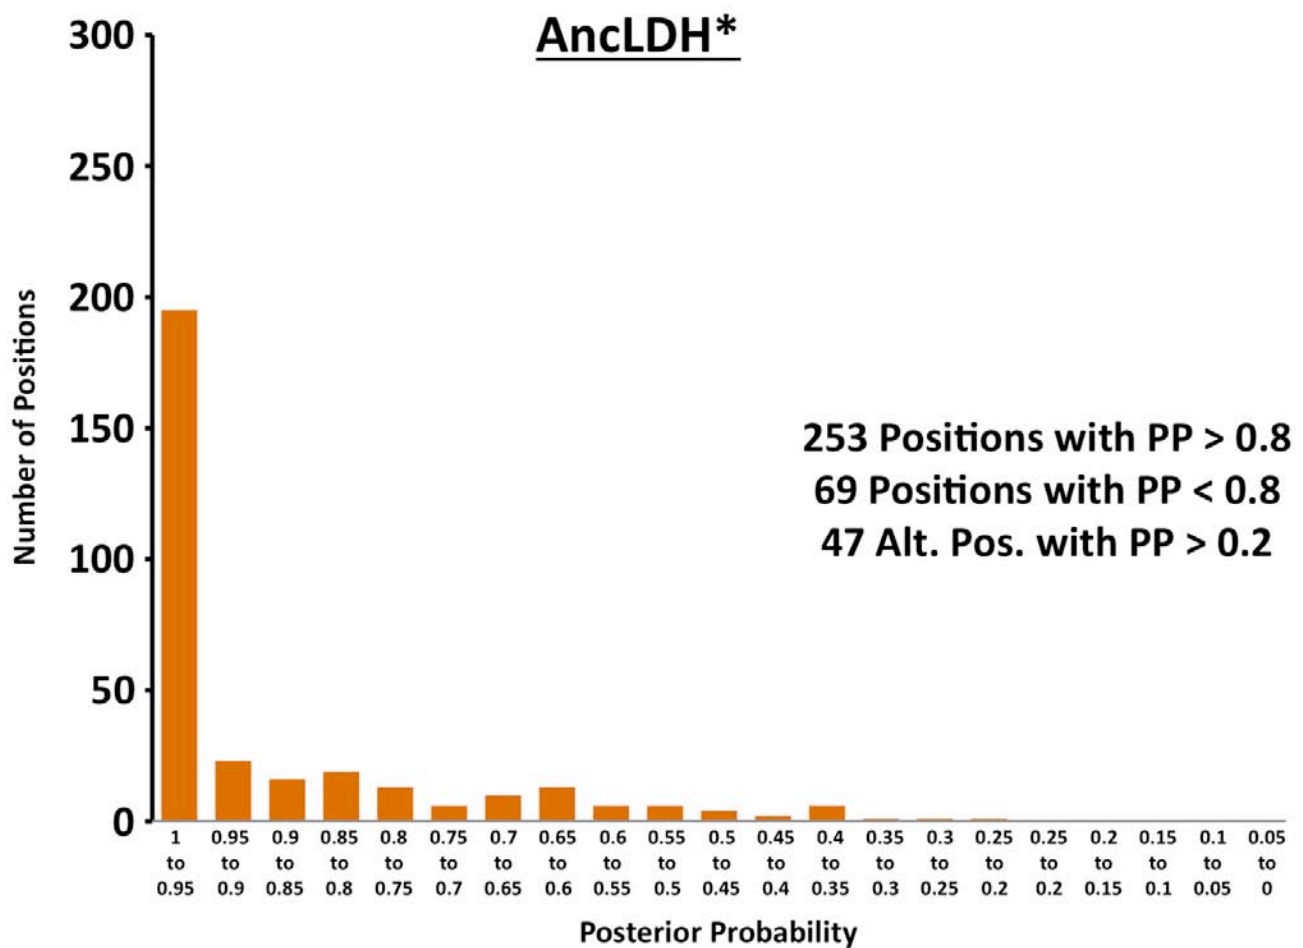

Supplement: supp [file elife_poa_e02304_Figure_6_figure_supplement_6.pdf › elife_poa_e02304_Figure_6_figure_supplement_6.pdf]

## Figure 6-figure supplement 7

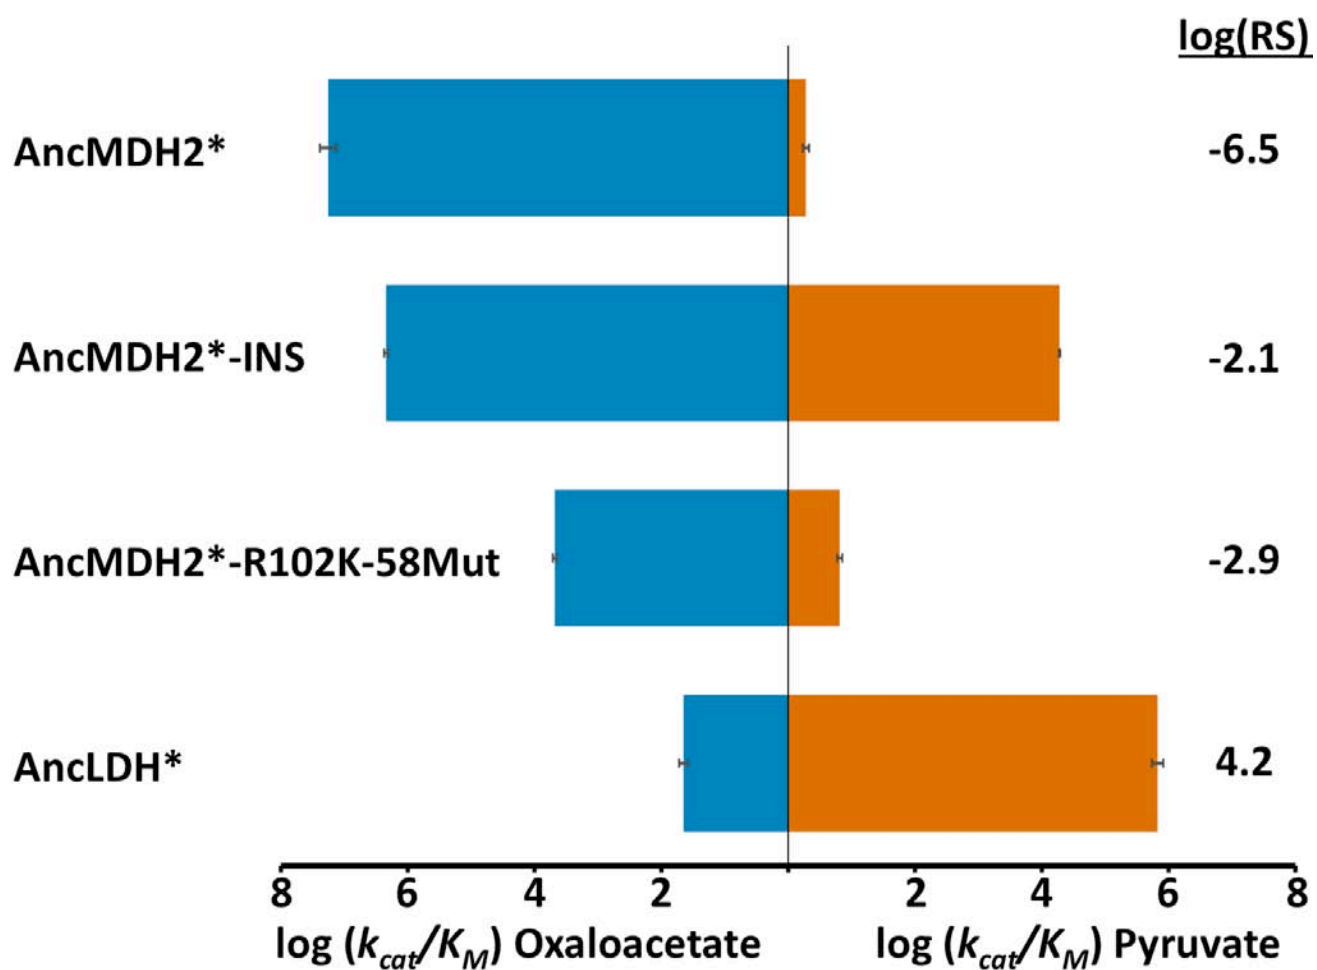

Supplement: supp [file elife_poa_e02304_Figure_6_figure_supplement_7.pdf › elife_poa_e02304_Figure_6_figure_supplement_7.pdf]
